# Supplementary material for: Tenomodulin highly expressing MSCs as a better cell source for tendon injury healing
Source: PubMed Central journal article supplement (PMC5652790; doi:10.18632/oncotarget.20495), 2017-08-24
Supplement: oncotarget-08-77424-s001.pdf [file oncotarget-08-77424-s001.pdf]

# Tenomodulin highly expressing MSCs as a better cell source for tendon injury healing

## SUPPLEMENTARY MATERIALS

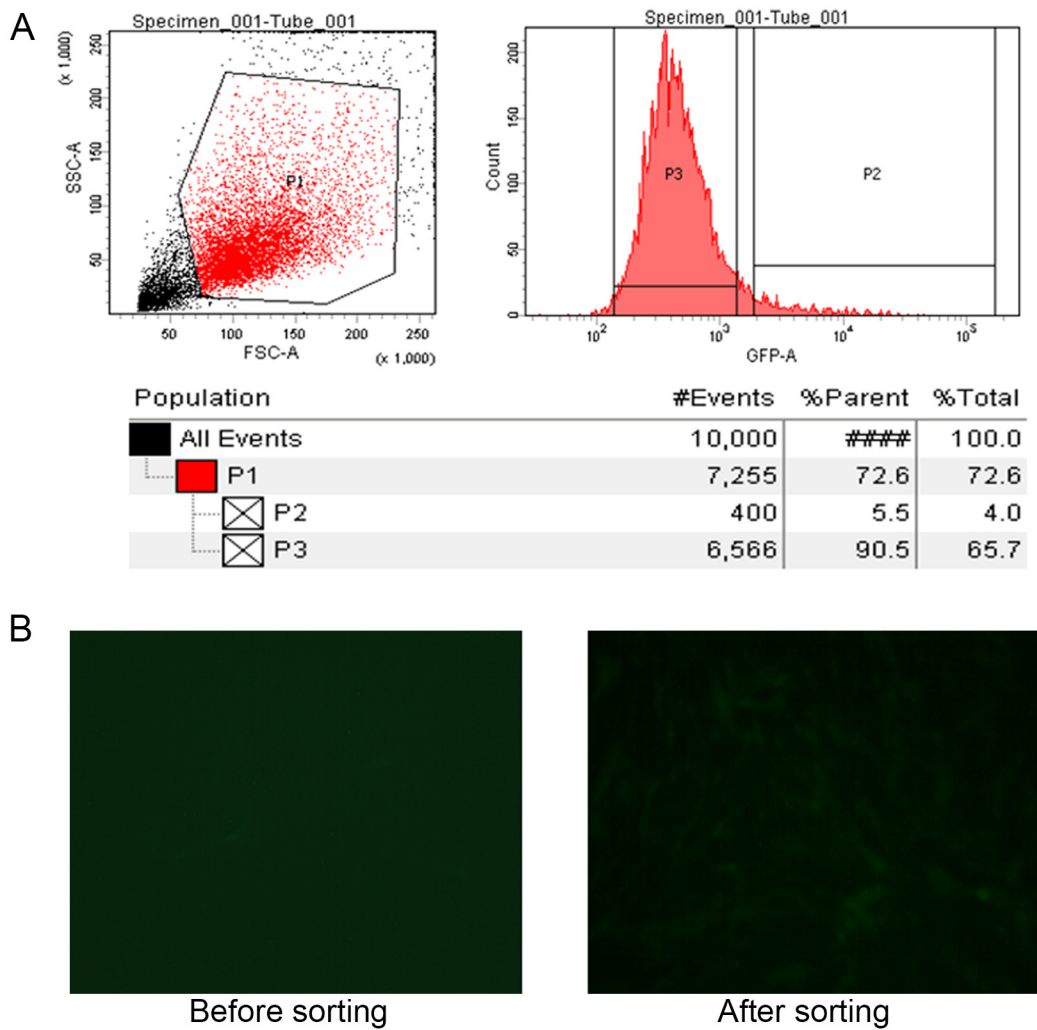

Supplementary Figure 1: Selecting Tnmd highly expressing hMSCs by flow cytometry.

Supplementary Table 1: Sequences of primers for real time PCR

| <i>Gene name</i> | <i>Forward primer sequence (5' to 3')</i> | <i>Reverse primer sequence (5' to 3')</i> |
|------------------|-------------------------------------------|-------------------------------------------|
| <i>ACAN</i>      | GCGAGTTGTCATGGTCTGAA                      | GCCGGCCCAAGAGAGAA                         |
| <i>Scx</i>       | CTGGCCTCCAGCTACATCTC                      | CGGTCCTTGCTCAACTTTCT                      |
| <i>Tnmd</i>      | TGCTGTAGAAAGTGTGCTCCA                     | GATTTGTGGACTGGTGTTTGG                     |
| <i>TNC</i>       | GGCTCTAGGGCTCTAGGGATT                     | CCTAGGTCTCTCGCCCATC                       |
| <i>GAPDH</i>     | CGTAAAGACCTCTATGCCAACA                    | CGGACTCATCGTACTCCTGCT                     |
| <i>FMOD</i>      | AGAAGTTCACGACGTCCACC                      | CAGCCTCCTTGAGCTAGACC                      |
| <i>Coll</i>      | CACTGGTGATGCTGGTCTCTG                     | CGAGGTACGGTCACGAAC                        |
| <i>GDF6</i>      | TGCACGTGAACTTCAAGGAG                      | CCCGCGTCGATGTATAGAAT                      |
| <i>GDF7</i>      | TCATTCAGACGCTGCTCAAC                      | GTGTGCTCTCCCTCCTCTGA                      |

Supplementary Table 2: Sequences of siRNA targeting GDF6 and GDF7

| Gene     | Sequence               |                       |
|----------|------------------------|-----------------------|
|          | Sense (5'-3')          | Antisense (5'-3')     |
| siGDF7-1 | GCAGAGGAAAGAGAGCUUATT  | UAAGCUCUCUUUCCUCUGCTT |
| siGDF7-2 | CCACCAACCAUGCCAUCAUTT  | AUGAUGGCAUGGUUGGUGGTT |
| siGDF7-3 | CCAACAACGUUGUCUACAATT  | UUGUAGACAACGUUGUUGGTT |
| siGDF6-1 | CUGGUGGUAAUUCACCAGAUTT | AUCUGGUGAAUACCACCAGTT |
| siGDF6-2 | CCCAUCAGCAUUCUAUACATT  | UGUAUAGAAUGCUGAUGGGTT |
| siGDF6-3 | CGGGCAAUAAUGUGGUCUATT  | UAGACCACAUUAUUGCCCGTT |

**Supplementary Data: RPKM result of RNAseq**

See Supplementary File 1
